# Supplementary material for: Association of Arsenic and Metals with Concentrations of 25-Hydroxyvitamin D and 1,25-Dihydroxyvitamin D among Adolescents in Torreón, Mexico
Source: PubMed Central journal article supplement (PMC4216165; doi:10.1289/ehp.1307861), 2014-08-05
Supplement: ehp.1307861.s001.508.pdf [file ehp.1307861.s001.508.pdf]

**Supplemental Material**

**Association of arsenic and metals with concentrations  
of 25-hydroxyvitamin D and 1,25-dihydroxyvitamin D among  
adolescents in Torreon, Mexico**

Rachel D. Zamoiski, Eliseo Guallar, Gonzalo G. García-Vargas, Stephen J. Rothenberg, Carol Resnick, Marisela Rubio Andrade, Amy J. Steuerwald, Patrick J. Parsons, Virginia M. Weaver, Ana Navas-Acien, and Ellen K. Silbergeld

**Table S1.** Spearman correlation matrix of blood lead and creatinine-corrected urine metal and arsenic concentrations.

|    | <b>Pb</b> | <b>As</b> | <b>Cd</b> | <b>Mo</b> | <b>TI</b> | <b>U</b> |
|----|-----------|-----------|-----------|-----------|-----------|----------|
| Pb | 1.00      |           |           |           |           |          |
| As | 0.24      | 1.00      |           |           |           |          |
| Cd | 0.43      | 0.26      | 1.00      |           |           |          |
| Mo | 0.09      | 0.37      | 0.17      | 1.00      |           |          |
| TI | 0.26      | 0.35      | 0.32      | 0.24      | 1.00      |          |
| U  | 0.18      | 0.56      | 0.24      | 0.18      | 0.26      | 1.00     |

**Table S2.** Change in mean 25(OH)D and 1,25(OH)<sub>2</sub>D concentrations per doubling of As in non-fish eaters (n = 449)

| <b>Exposure</b> | <b>25(OH)D (ng/mL)</b> | <b>p-value</b> | <b>1,25(OH)<sub>2</sub>D (pg/mL)</b> | <b>p-value</b> |
|-----------------|------------------------|----------------|--------------------------------------|----------------|
| <b>As</b>       |                        |                |                                      |                |
| Model 1         | 1.1 (-0.2, 2.3)        | 0.10           | 4.1 (1.4, 6.8)                       | < 0.01         |
| Model 2         | 0.2 (-1.0, 1.4)        | 0.70           | 4.1 (1.3, 6.9)                       | 0.01           |
| Model 3         | NA                     | NA             | 4.0 (1.2, 6.7)                       | 0.01           |

Model 1: Adjusted for age and sex.

Model 2: Adjusted for age, sex, season, SES (family income < 3000 pesos/month, ≥ 3000 pesos/month, or unknown), smoking (never, former, or within the past month), adiposity, time spent outside.

Model 3: Adjusted for age, sex, season, SES, smoking, adiposity, time spent outside, 25(OH)D.

**Table S3.** Change in mean in 25(OH)D (ng/mL) and 1,25(OH)<sub>2</sub>D (pg/mL) per doubling of metal dose by sex.

| Exposure  | 25(OH)D<br>Girls<br>β (95% CI) | p-value | 25(OH)D<br>Boys<br>β (95% CI) | p-value | p-int | 1,25(OH) <sub>2</sub> D<br>Girls<br>β (95% CI) | p-value | 1,25(OH) <sub>2</sub> D<br>Boys<br>β (95% CI) | p-value | p-int |
|-----------|--------------------------------|---------|-------------------------------|---------|-------|------------------------------------------------|---------|-----------------------------------------------|---------|-------|
| <b>Pb</b> |                                |         |                               |         |       |                                                |         |                                               |         |       |
| Model 1   | 0.6 (-0.6, 2.0)                | 0.32    | -1.2 (-2.6, 0.2)              | 0.09    | 0.03  | -1.0 (-4.0, 1.9)                               | 0.50    | 0.1 (-3.0, 3.2)                               | 0.96    | 0.70  |
| Model 2   | 1.0 (-0.3, 2.3)                | 0.33    | -1.4 (-2.6, -0.1)             | 0.04    | 0.03  | -0.4 (-3.6, 2.9)                               | 0.81    | 1.2 (-2.1, 4.5)                               | 0.48    | 0.52  |
| Model 3   | NA                             | NA      | NA                            | NA      | NA    | -0.8 (-4.0, 2.4)                               | 0.63    | 1.9 (-1.4, 5.2)                               | 0.25    | 0.29  |
| <b>As</b> |                                |         |                               |         |       |                                                |         |                                               |         |       |
| Model 1   | 0.4 (-1.1, 2.0)                | 0.59    | 0.9 (-0.7, 2.5)               | 0.24    | 0.99  | 4.7 (1.3, 8.1)                                 | 0.01    | 2.5 (-1.0, 6.0)                               | 0.15    | 0.32  |
| Model 2   | 0.1 (-1.4, 1.5)                | 0.94    | 0.1 (-1.4, 1.5)               | 0.94    | 0.41  | 4.9 (1.3, 8.5)                                 | 0.01    | 2.6 (-1.0, 6.3)                               | 0.15    | 0.42  |
| Model 3   | NA                             | NA      | NA                            | NA      | NA    | 4.9 (1.3, 8.4)                                 | 0.01    | 2.6 (-1.0, 6.2)                               | 0.15    | 0.33  |
| <b>Cd</b> |                                |         |                               |         |       |                                                |         |                                               |         |       |
| Model 1   | 0.1 (-0.9, 1.1)                | 0.89    | 0.15 (-0.9, 1.2)              | 0.77    | 0.92  | -0.8 (-3.1, 1.4)                               | 0.46    | -0.1 (-2.3, 2.2)                              | 0.95    | 0.64  |
| Model 2   | 0.4 (-0.5, 1.4)                | 0.37    | 0.1 (-0.8, 1.1)               | 0.76    | 0.76  | -0.8 (-3.1, 1.5)                               | 0.48    | 1.1 (-1.3, 3.4)                               | 0.38    | 0.51  |
| Model 3   | NA                             | NA      | NA                            | NA      | NA    | -1.0 (-3.3, 1.3)                               | 0.39    | 1.0 (-1.3, 3.3)                               | 0.41    | 0.47  |
| <b>Mo</b> |                                |         |                               |         |       |                                                |         |                                               |         |       |
| Model 1   | 2.4 (0.6, 4.1)                 | 0.01    | 2.3 (0.8, 3.8)                | < 0.01  | 0.67  | -0.2 (-4.3, 3.9)                               | 0.92    | 3.0 (-0.4, 6.3)                               | 0.08    | 0.32  |
| Model 2   | 1.5 (-0.3, 3.3)                | 0.09    | 1.2 (-0.2, 2.6)               | 0.09    | 0.56  | -0.3 (-4.6, 4.1)                               | 0.91    | 3.4 (0.0, 6.0)                                | 0.05    | 0.19  |
| Model 3   | NA                             | NA      | NA                            | NA      | NA    | -0.9 (-5.2, 3.5)                               | 0.70    | 2.9 (-0.6, 6.3)                               | 0.10    | 0.22  |
| <b>Tl</b> |                                |         |                               |         |       |                                                |         |                                               |         |       |
| Model 1   | 0.6 (-0.7, 2.0)                | 0.36    | 1.8 (0.4, 3.2)                | 0.01    | 0.54  | 0.3 (-2.8, 3.3)                                | 0.87    | -2.9 (-6.0, 0.1)                              | 0.06    | 0.12  |
| Model 2   | 0.7 (-0.6, 2.0)                | 0.31    | 1.8 (0.5, 3.1)                | 0.01    | 0.18  | 2.1 (-1.1, 5.3)                                | 0.19    | -1.1 (-4.4, 2.2)                              | 0.49    | 0.19  |
| Model 3   | NA                             | NA      | NA                            | NA      | NA    | 1.9 (-1.3, 5.1)                                | 0.24    | -2.1 (-5.4, 1.2)                              | 0.20    | 0.11  |
| <b>U</b>  |                                |         |                               |         |       |                                                |         |                                               |         |       |
| Model 1   | 0.9 (0.1, 1.8)                 | 0.03    | 0.4 (-0.6, 1.5)               | 0.41    | 0.29  | 2.5 (0.7, 4.5)                                 | 0.01    | 1.1 (-1.2, 3.5)                               | 0.35    | 0.28  |
| Model 2   | 0.4 (-0.4, 1.3)                | 0.32    | -0.5 (-1.5, 0.5)              | 0.30    | 0.53  | 2.5 (0.5, 4.6)                                 | 0.02    | 1.3 (-1.1, 3.8)                               | 0.28    | 0.38  |
| Model 3   | NA                             | NA      | NA                            | NA      | NA    | 2.4 (0.4, 4.4)                                 | 0.02    | 1.6 (-0.8, 4.0)                               | 0.19    | 0.44  |

Model 1: Adjusted for age.

Model 2: Adjusted for age, season, SES (family income < 3000 pesos/month, ≥ 3000 pesos/month, or unknown), smoking (never, former, or within the past month), adiposity, time spent outside.

Model 3: Adjusted for age, season, SES, smoking, adiposity, time spent outside, 25(OH)D.
